# Supplementary material for: Development of the Long-term Harmonized multi-satellite SIF (LHSIF) dataset at 0.05° resolution (1995–2023)
Source: Copernicus journal article supplement (doi:10.5194/essd-2025-94), 2025-04-28
Supplement: Supplementary file 1 [file essd-2025-94-supplement.pdf]

# Development of the Long-term Harmonized multi-satellite SIF (LHSIF) dataset at 0.05° resolution (1995–2023)

Chu Zou<sup>1,2,3</sup>, Shanshan Du<sup>1,2</sup>, Xinjie Liu<sup>1,2</sup>, Liangyun Liu<sup>1,2,3</sup>

<sup>1</sup> Key Laboratory of Digital Earth Science, Aerospace Information Research Institute, Chinese Academy of Sciences, Beijing, 100094, China

<sup>2</sup> University of Chinese Academy of Sciences, Beijing 100049, China

<sup>3</sup> International Research Center of Big Data for Sustainable Development Goals, Beijing 100094, China

Correspondence to: Liangyun Liu ([liuly@radi.ac.cn](mailto:liuly@radi.ac.cn))

## Supplementary Materials

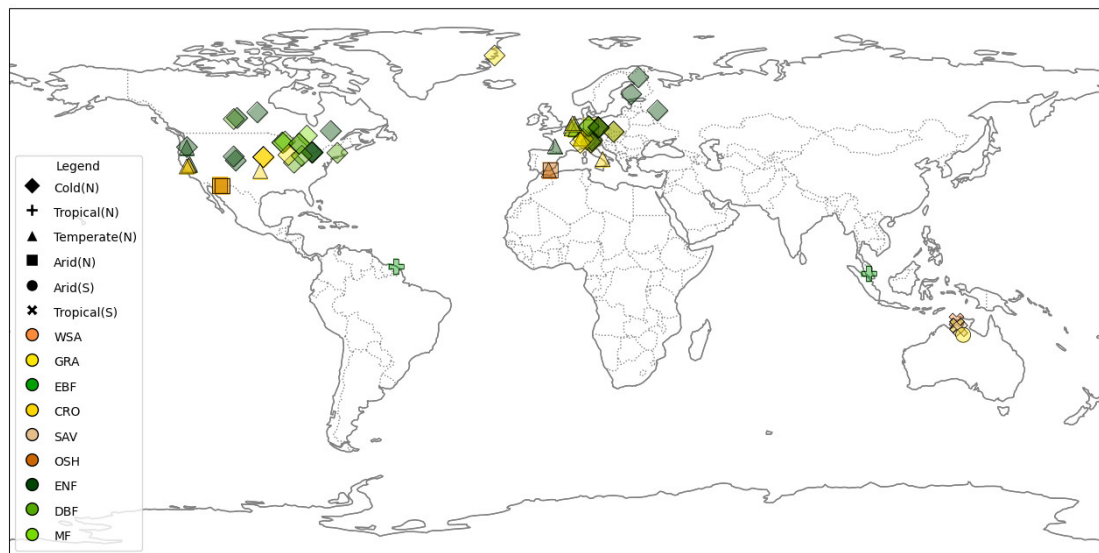

Figure S1 Global distribution of FLUXNET sites labeled by their climate zones and IGBP vegetation types.

Table S 1 Information for the ChinaSpec sites

| Site_Name    | ID  | Location                 | Landcover Type                                | Time range* |
|--------------|-----|--------------------------|-----------------------------------------------|-------------|
| XiaoTangshan | XTS | 40.1786°N,<br>116.4432°E | Cropland (winter wheat<br>and maize rotation) | 2017–2023   |
| HuaiLai      | HL  | 40.3489°N,<br>115.7882°E | A mixture of grassland<br>and forest          | 2017–2023   |
| DaMan        | DM  | 38.8555°N,<br>100.3722°E | Cropland (maize)                              | 2017–2022   |
| ARou         | AR  | 38.0444°N,<br>100.4647°E | Grassland                                     | 2019–2023   |
| GuCheng      | GC  | 39.1486°N,<br>115.7351°E | Cropland (winter wheat<br>and maize rotation) | 2020–2022   |

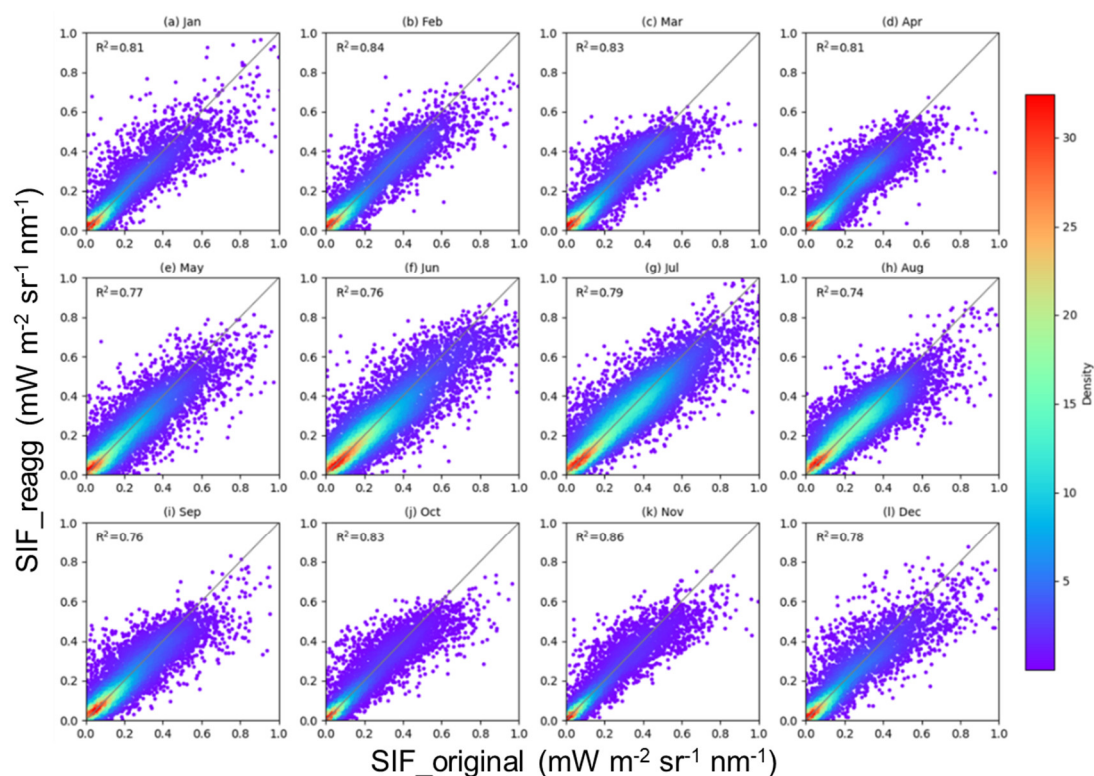Figure S2 The relationship between the re-aggregated SCIAMACHY SIF ( $SIF_{reagg}$ ) and coarse spatial resolution SCIAMACHY SIF ( $SIF_{original}$ ) for different months in 2007.

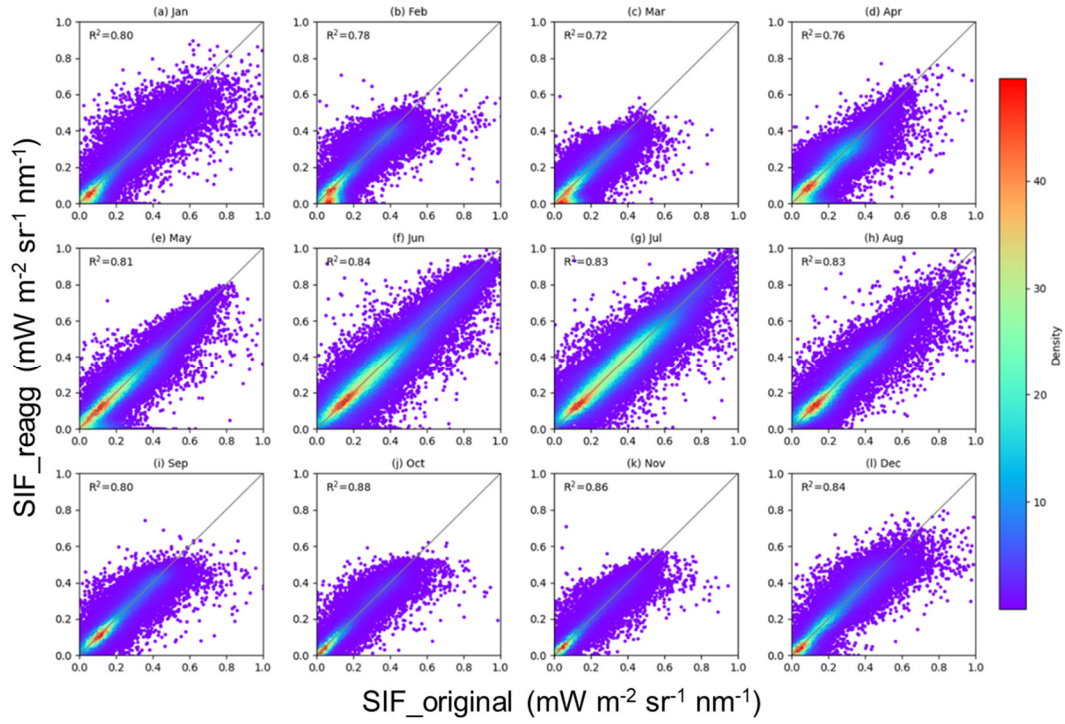

Figure S3 The relationship between the re-aggregated GOME-2 SIF (SIF\_reagg) and coarse spatial resolution GOME-2 SIF(SIF\_original) for different months in 2007.

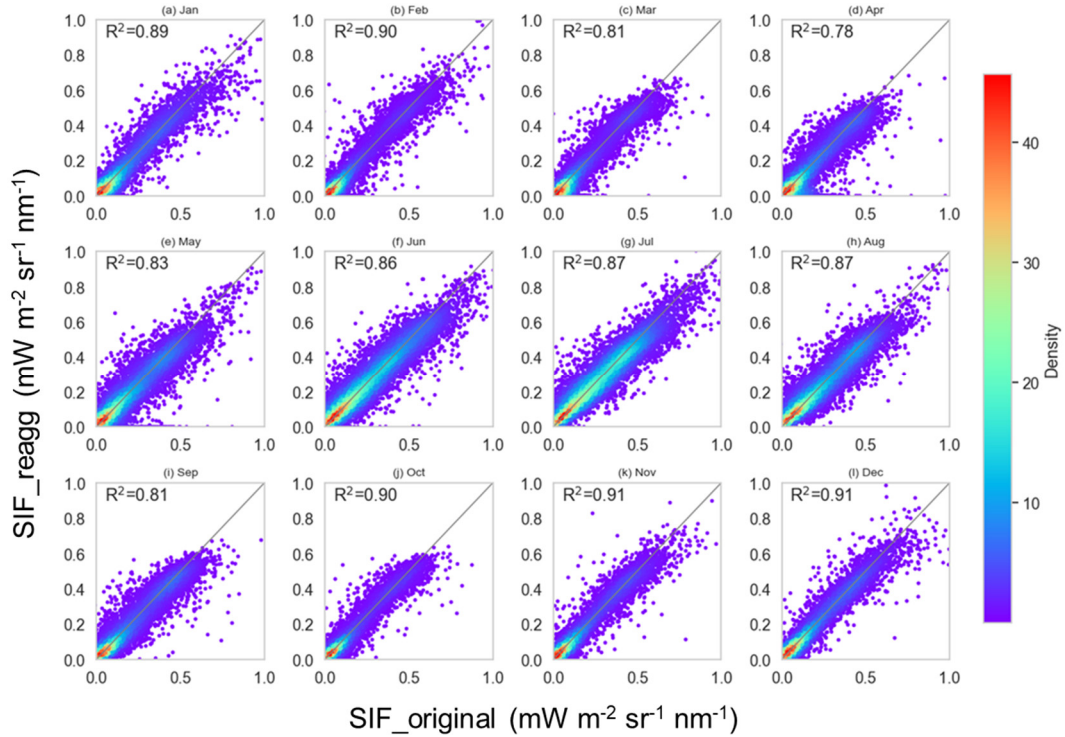

Figure S4 The relationship between the re-aggregated OCO-2 SIF (SIF\_reagg) and coarse spatial resolution OCO-2 SIF(SIF\_original) for different months in 2015.
